1

2

3

4 **What doesn't kill you makes you stronger: detoxification ability as an honest**

5 **sexually selected signal.**

6

7 Isaac González-Santoyo<sup>1\*</sup>, Daniel González-Tokman<sup>2</sup>, Miguel Tapia-Rodríguez<sup>3</sup>, Alex

8

Córdoba-Aguilar<sup>4\*</sup>

9

10

11

12

13 <sup>1</sup>Neuroecology Lab. Facultad de Psicología, Universidad Nacional Autónoma de México,  
14 Ciudad Universitaria, 04510 Ciudad de México, México.

15

16 <sup>2</sup>CONACYT, Red de Ecoetología, Instituto de Ecología A. C., Xalapa, México.

17

18 <sup>3</sup>Unidad de Microscopía, Instituto de Investigaciones Biomédicas, Universidad Nacional  
19 Autónoma de México, Ciudad Universitaria, 04510, Ciudad de México, México.

20

21 <sup>4</sup>Instituto de Ecología, Universidad Nacional Autónoma de México, Ciudad Universitaria,  
22 04510, Ciudad de México, México.

23

24 \*Corresponding authors: [isantoyo.unam@gmail.com](mailto:isantoyo.unam@gmail.com); [acordoba@ieciologia.unam.mx](mailto:acordoba@ieciologia.unam.mx)

25

26

27

28

29

30

31

32

33

34

35

36

37 **Abstract**

38 Sexual selection maintains colourful signals that increase sexual attractiveness and  
39 dominance. Some sexually selected, colourful signals are pigments synthesized from  
40 ingested amino acids. The underlying metabolic pathways for these pigments often  
41 release toxic byproducts that can reduce individual survival. However, rather than  
42 discarding these otherwise harmful byproducts, animals may use them by integrating  
43 them into sexually selected traits. We tested this idea using males of the damselfly  
44 *Hetaerina americana*, which bear a red-pigmented wing spot that is sexually selected  
45 through male-male competition for mating territories. First, by using chromatography and  
46 confocal microscopy, we determined that the red wing spots are generated by  
47 ommochrome pigments derived from tryptophan metabolism. Second, we injected a  
48 group of males with the toxic precursor of these ommochromes, 3-hydroxy-kynurenine  
49 (3-Hk), confirming the toxicity of this compound in adult males. Finally, by using  
50 spectrophotometry and confocal microscopy, we showed that adult males injected with a  
51  $LC_{50}$  of 3-Hk had more ommochromes in their wing spots than controls but similar  
52 survival, suggesting that the deposition of ommochrome pigment in the wing detoxifies  
53 the tryptophan metabolism process. Thus, we report for the first time that sexually  
54 selected pigmented signals involve the biochemical treatment of excreted compounds that  
55 could otherwise have lethal effects, a hypothesis we call “detoxifying ability signalling”.  
56 Our results provide new insights about the origin and maintenance of sexual signals,  
57 elucidating a mechanism for the evolution of honest indicators of quality that could have  
58 arisen due to natural selection.

59

## 60 **Introduction**

61 Some animal colours result from the sequestration as pigments in the integument of  
62 harmful metabolic products that cannot be easily eliminated from the body during  
63 digestion <sup>1</sup>. This mechanism is called storage excretion. What makes this mechanism  
64 particularly interesting is that rather than being harmful, the excreted pigments can  
65 generate external colouration that has adaptive functions such as camouflage or signalling  
66 information to conspecifics and heterospecifics. For example, excessive uric acid, the  
67 main nitrogen metabolic waste of terrestrial insects, sometimes cannot be completely  
68 eliminated during digestion but is excreted as a white or yellow pigment that is deposited  
69 in the larval cuticle of several species of pierid butterflies <sup>2</sup>. This deposition creates the  
70 impression of bird droppings, which looks distasteful for predators, decreasing predation  
71 and thus increasing larval survival <sup>2</sup>. Similar pigmentation patterns in adult butterflies,  
72 resulting from storage excretion, have been proposed to be involved in sexual selection  
73 processes, such as colourful traits used for attracting mates or dissuading conspecifics  
74 during male-male competition.

75 A classical tenet in sexual selection theory is that the expression of pigmented traits has  
76 evolved because these colours grant individuals an advantage during mate choice or  
77 intrasexual competition for mates <sup>3</sup>. For instance, it has been observed that bright male  
78 colouration is maintained by sexual selection because it can only be produced by high  
79 quality (e.g. well-fed) individuals that can afford the production of pigments without  
80 compromising other traits that require the same limiting resource <sup>4</sup>. Interestingly, genes  
81 responsible for colouration interact pleiotropically with other genes that can be involved  
82 in important physiological functions such as thermoregulation, photoprotection,

83 desiccation resistance, immunoregulation, antioxidation and excretion of toxic  
84 compounds that may result from metabolism and immune response <sup>5-7</sup>. Therefore,  
85 pigmentation that reflects efficient metabolism may be subject to strong sexual selection  
86 if they honestly reflect individual genetic and physiological condition <sup>6,8</sup>.

87

88 Storage excretion as a mechanism of sexual pigmentation has not been discussed and  
89 examined in detail despite providing a clear physiological and evolutionary explanation  
90 of the origin and maintenance of many sexual signals. Storage excretion can be  
91 particularly important when the synthesis of such pigments is involved in physiological  
92 pathways that generate waste products that are difficult to eliminate or inactivate.  
93 Moreover, the assumption that the trait provides honest information about the quality of  
94 the bearer is upheld, since the use of toxic byproducts to generate visible colouration  
95 could be doubly informative: pigments signal the bearer's ability to deal with toxic  
96 metabolites that could otherwise impair their survival, as well as the genetic and/or  
97 physiological condition since for example, because only individuals with better diets or  
98 protein metabolism will produce a large enough amount of the byproducts to require  
99 storage excretion of the pigments (as suggested by <sup>6</sup>).

100 Red pigments are common in several invertebrates, and most of their underlying  
101 components are ommochromes <sup>9</sup>. In insects, ommochromes give colour to structures such  
102 as the eyes and the wings of flies, butterflies and damselflies <sup>10-12</sup>. These red pigments  
103 result from the metabolism of tryptophan, an essential amino acid that is consumed from  
104 food <sup>12,13</sup>. Ommochrome pigments are synthesized from the tryptophan metabolite 3-  
105 hydroxykynurenine (3-Hk), which together with tryptophan, are considered neurotoxic

106 compounds that cause paralysis, altered mating behaviour, aging and high mortality in  
107 adult insects<sup>14-17</sup>. In fact, wild type flies fed with inhibitors of tryptophan-kynurenine  
108 metabolism show increased survival compared to control flies<sup>17</sup>. 3-Hk is present at high  
109 concentrations during metamorphosis when protein breakdown releases high quantities of  
110 this tryptophan product<sup>12</sup>. Given the noxious effects of 3-Hk, an important way in which  
111 insects can deal with excessive neurotoxic byproducts is via the synthesis of  
112 ommochromes, which can be eliminated in the meconium during pupation in  
113 holometabolous insects, in the excreta or by storage excretion in the form of cuticular  
114 pigmentations, a hypothesis proposed by Linzen in 1974 and called “the tryptophan-  
115 detoxification hypothesis”<sup>5,9,18</sup>. In fact, both 3-Hk and ommochrome pigments are found  
116 at high concentrations in the meconium of lepidopterans, the waste product from the  
117 pupal stage<sup>19</sup>.

118 Ommochromes can function as sexually selected signals and may be considered honest  
119 indicators of individual quality, since only well-fed individuals will accumulated high  
120 enough amounts of these metabolites to develop conspicuous signals<sup>20</sup>.

121 Here, we propose that ommochromes as component of male sexual traits can be used for  
122 detoxification, providing a new mechanism of sexual signal production and fulfilling the  
123 honesty principle. We tested these ideas using males of the rubyspot damselfly *Hetaerina*  
124 *americana*. This species is a classic model in sexual selection studies: males bear a red  
125 wing spot (RWS; Fig. 1a) whose size is an honest indicator of individual condition, and  
126 which provides an advantage during male-male competition<sup>21,22</sup>. We (1) determined the  
127 presence of ommochromes in the wing spot, (2) tested the toxic effect of 3-  
128 hydroxykynurerine (3-Hk), the most toxic tryptophan metabolite and precursor of

129 ommochromes, and (3) measured deposition of ommochromes in wing spots of young  
130 adult males injected with 3-Hk.

131

## 132 **Results**

133 All biochemical test confirmed the presence of ommochromes as main pigments in the  
134 RWS (Fig. 1a). Besides Redox Behaviour, we observed that the absorption spectra from  
135 the red powder diluted in 5N HCl displayed three absorbance wavelength peaks; 249, 357  
136 and 460 nm with relative absorbances of 2.49, 0.52 and 0.74 respectively. The red  
137 pigment dissolved in phosphate buffer (pH 7.0) displayed peaks at two different  
138 wavelengths: 235 and 429 nm with relative absorbances of 2.68 and 0.68 respectively  
139 (Fig. 1b).

140 Moreover, our TLC analysis indicates that xanthommatin is an ommochrome present in *H.*  
141 *americana* male RWS. When the silica gel plate was exposed to the UV spectrum, we  
142 observed a slightly defined band with a  $R_f = 0.15 \pm 0.013$  and a well-defined band with  $R_f$   
143  $= 0.36 \pm 0.012$  (Fig. 1b), which coincides with the standard synthetic ommochrome  
144 xanthommatin ( $R_f=0.36$ ) when the same silica gel/phenol TLC system is implemented<sup>23</sup>.  
145 The other slightly defined band observed showed a similar  $R_f$  value to the same  
146 xanthommatin, but in its reduced form, dihydro-xanthommatin ( $R_f=0.13$ <sup>23</sup>). We also  
147 found a slight third band (Fig. 1b), which may correspond to 3-Hk ( $R_f=0.52$ <sup>23</sup>), although  
148 it was very faint.

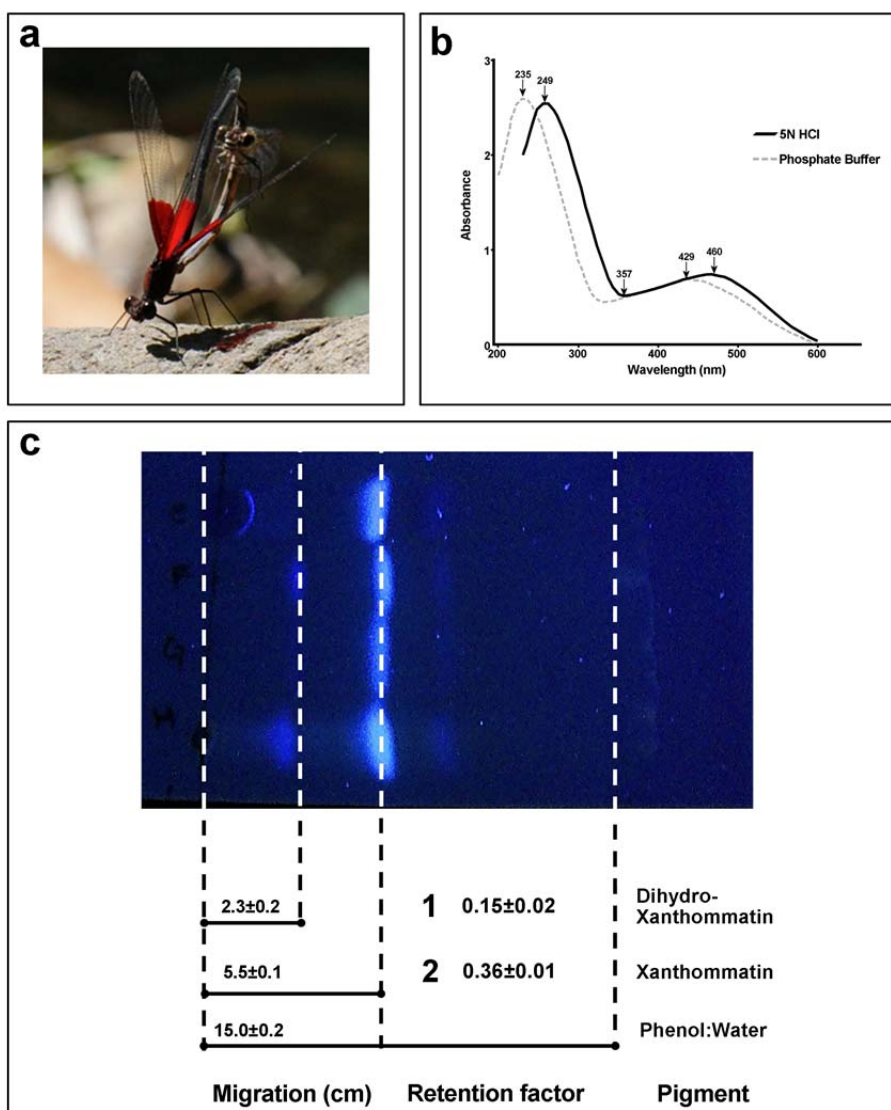

149

150

151 **Figure 1.** (a) *Hetaerina americana* male showing his red wing spot (RWS) during  
 152 mating. (b) Spectral absorbance analysis showing the presence of ommochrome pigments  
 153 in the RWS. The red powder dissolved in 5N HCl (solid black line) or phosphate buffer  
 154 (dashed grey line) show a typical spectral behaviour of the pigment xanthommatin. (c)  
 155 UV spectrum photography from the thin layer chromatography (TLC) confirmed the  
 156 presence of xanthommatin. The column migration and dashed lines show the distance  
 157 travelled (cm) by the two bands observed in the TLC and by the solvent used  
 158 (Phenol:Water). The retention factor (Rf) for these bands (1 and 2) were consistent with  
 159 the authentic standard of xanthommatin (number 2) and its reduced form dihydro-  
 160 xanthommatin (number 1). The Rf of the authentic standard of xanthommatin was  
 161 reported by Nijouth (1997) using the same TLC method.

162 In addition, patterns of autofluorescence in the RWS were observed in the spectral  
163 confocal microscope. Figure 2 shows MIP images obtained from XYZ $\lambda$  scans of both red  
164 (Fig. 2a) and transparent (Fig. 2b) regions of a representative control wing (Fig. 2c)  
165 excited with 561 nm wavelength light. We excited separately with 405, 488, 561 and 647  
166 nm wavelengths and found two main types of fluorescence: the most conspicuous  
167 corresponds to ommochrome pigments, which are distributed along the wing veins (Fig.  
168 2a and d) and spread over the wing tissue in the red pigmented area (Fig. 2d and 2e), but  
169 not in the transparent region (Fig. 2b). This signal was strongest when excited at 561 nm,  
170 but it was also visible when excited at 405 or 488 but not at 647 nm wavelengths (see  
171 supplementary figures 1a, 1b and 1c). The other main type of fluorescence observed was  
172 autofluorescence of both the red and the transparent wing regions, which can be  
173 attributed to the reflection of light by the wax that covers the wings. This type of  
174 fluorescence occurred at all wavelengths (see supplementary figures 1a, 1b and 1c) and  
175 shows a characteristic periodicity on its distribution pattern.



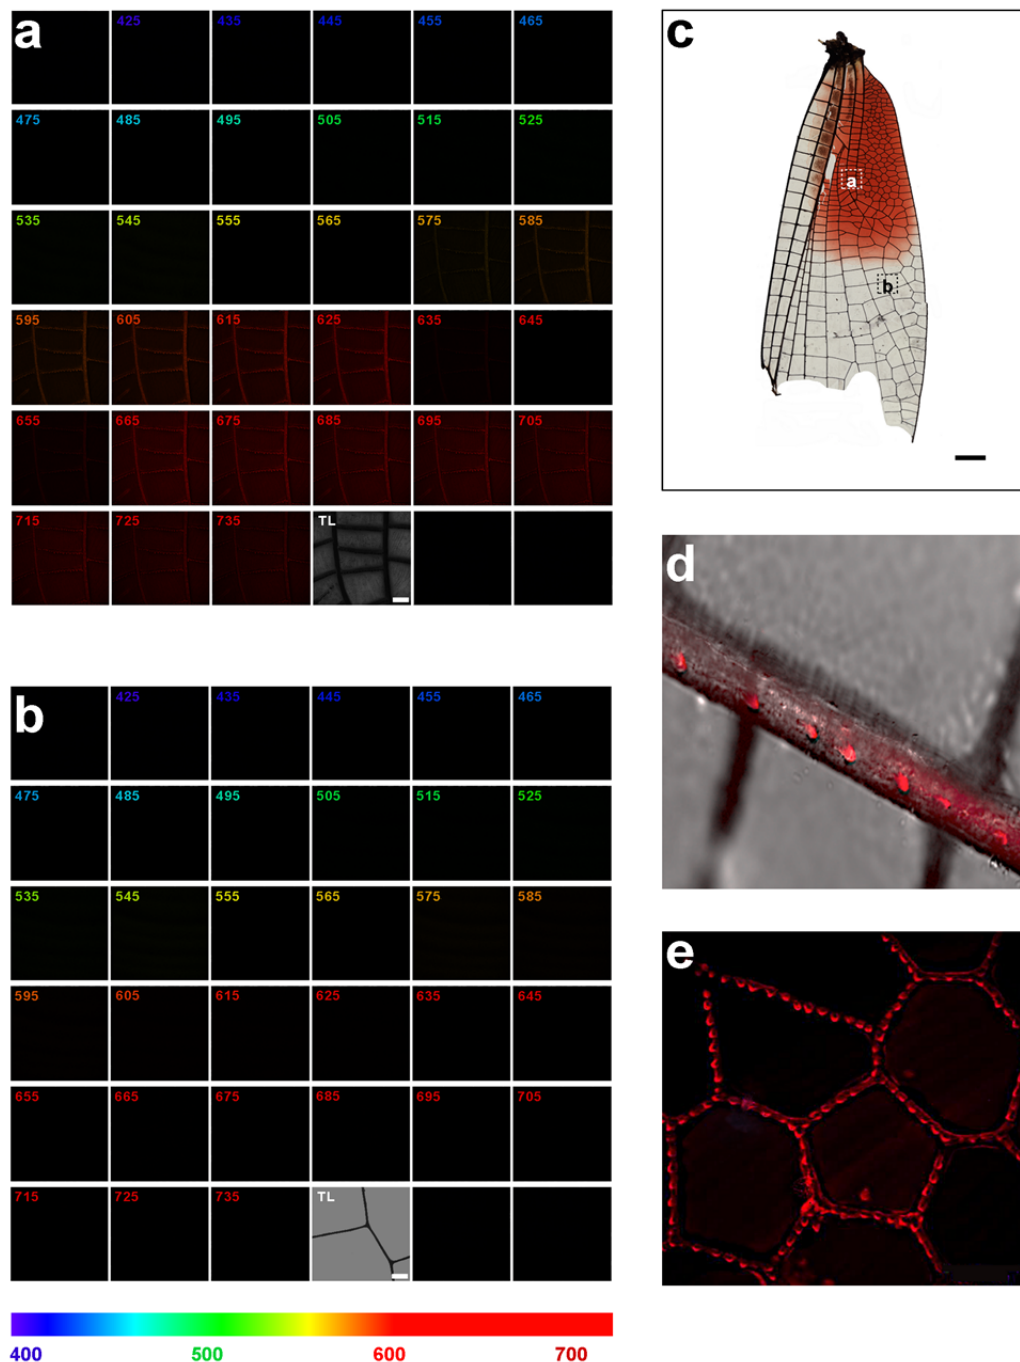

176 **Figure 2.** Fluorescence XYZ $\lambda$  scans (425-735 nm) of *H. americana* wings excited at 561  
177 nm. Maximum intensity projection images of (a) a sub-region of the red-pigmented area,  
178 and (b) a sub-region of the transparent area, depicted in (c). Each frame in (a) and (b)  
179 represent a specific wavelength image, as indicated. Fluorescence intensity was highest  
180 between 615-725 nm in the red pigmented area but not in the transparent region. Higher  
181 magnifications show the presence of red fluorescence spots distributed along the wing  
182 veins  $\zeta$ (d) and diffusely spread over the wing tissue (e). Scale bars in a and b indicate  
183 100 $\mu$ m and in c, 1mm.

184 3-Hk had a range of toxic effects on *H. americana* males, from partial immobility at the  
185 lowest concentrations tested (1 and 100  $\mu\text{g mL}^{-1}$ ) to death for the highest concentrations  
186 (1000 and 10000  $\mu\text{g mL}^{-1}$ ). This toxicity led us to determine the  $\text{LC}_{50}$  for sexually mature  
187 adult males. We found that the group with the lowest 3-Hk concentration (1  $\mu\text{g mL}^{-1}$ )  
188 showed a mortality rate of 13.13%, while subsequent doses (100, 1000 and 10000  $\mu\text{g}$   
189  $\text{mL}^{-1}$ ) increased mortality to 40%, 46% and 53% respectively. Consequently,  $\text{LC}_{50}$  of 3-  
190 Hk for males of this species was estimated at 368.69  $\mu\text{g mL}^{-1}$  (C.I 95%: 78.5- 1729.9 $\mu\text{g}$   
191  $\text{mL}^{-1}$ ).

192 The mitigation of 3-Hk toxic effects by deposition of ommochromes in RWS was  
193 observed in males treated with the  $\text{LC}_{50}$  of 3-Hk, since they obtained similar survival to  
194 sham males ( $z=1.38$ ,  $P=0.167$ ; Figure 3); Control males survived less than sham ( $z=2.33$ ,  
195  $P=0.020$ ) or 3-Hk treated males ( $z=3.71$ ,  $P<0.001$ ) possibly because distilled water, the  
196 vehicle for experimental injections, rehydrated both males injected with 3-Hk and sham  
197 males. Survival was not dependent on body size, since this variable was not retained by  
198 the best-supported model selected by Akaike Information Criterion methods (AIC).

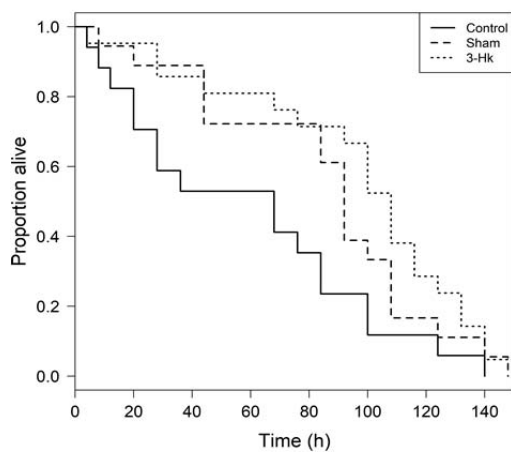

199

200 **Figure 3.** Survival time of *Hetaerina americana* males treated with 3-Hk, sham or  
201 control treatments.

202

203

204

205 In combinations with these results, we found that males treated with 3-Hk had higher  
206 values of  $R_c$  than males from the control or the sham treatments (Figure 4). Moreover,  
207 there was a significant effect (showed by the best AIC model) of treatments in interaction  
208 with survival time and in interaction with the RWS area (Sup. Table1). The interaction  
209 between treatment and survival shows that while red chroma was positively related to  
210 survival time in control males, red chroma was negatively related to survival time in  
211 sham males, and there was no relationship for 3-Hk treated males (see supplementary  
212 figure 2a). The interaction between treatment and RWS area indicated that even though  
213 RWS area was positively related to red chroma in all treatments, the slope was steeper in  
214 sham males than in control or 3-Hk treated males (see supplementary figure 2b).

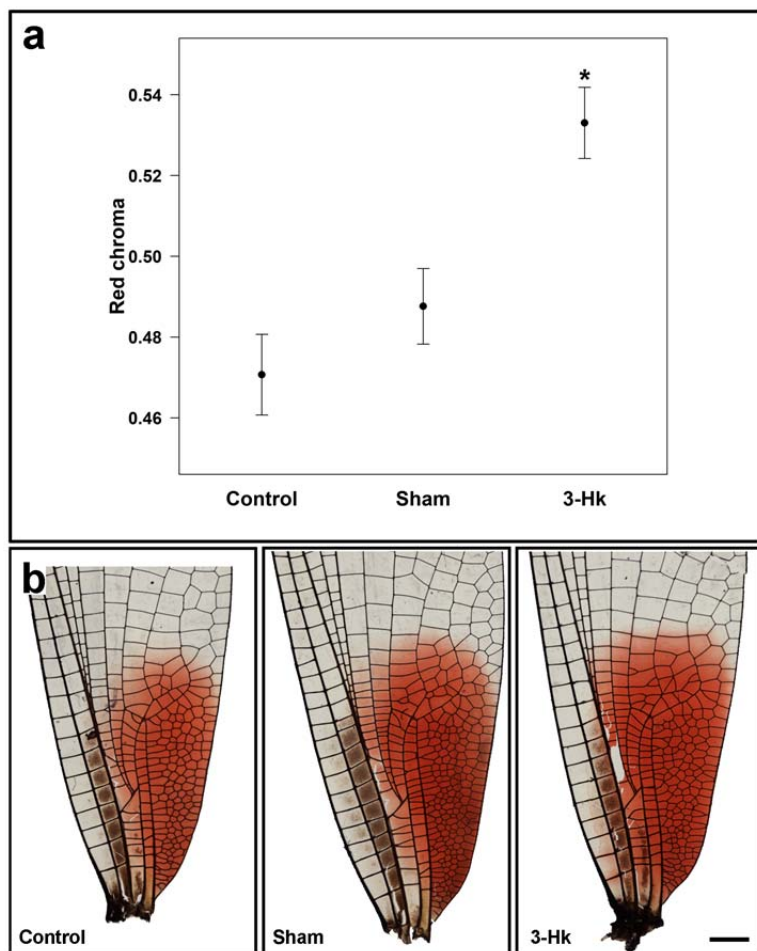

215

216 **Figure 4.** (a) Red chroma from RWS of *Hetaerina americana* males. Adult males  
217 injected with the toxic metabolite 3-Hk had higher values of red chroma than sham (i. e.  
218 Distiller water injected), and control (i. e. non-manipulated) males. (b) Bright field tile  
219 scan images of control, sham and 3-Hk treated males. Although the distribution of the  
220 wing veins is the same for all groups, qualitatively 3-Hk treatment shows stronger,  
221 diffuse red staining within the wing when compared with control and sham treatments.  
222 Scale bar: 1 mm.

223 \* Significance at level of  $p < 0.01$

224

225

226

227 On the other hand, mean values of  $Rf$  showed a slight difference between groups, with  
228 higher values in 3-Hk-treated males ( $1.09 \pm 0.17$ ) than sham ( $0.79 \pm 0.18$ ) and control males  
229 ( $0.84 \pm 0.20$ ). Nevertheless, the only statistically significant selected predictor for  $Rf$  was  
230 RWS area, as males with larger red areas had higher values of  $Rf$  ( $F_{1,28}=19.0$ ,  $P<0.001$ ;  
231 see supplementary figures 3a and 3b).

232

233

234

## Discussion

235 Ommochrome pigments were confirmed through all four of the biochemical properties  
236 we evaluated of the wings. Also, in support of this determination, TLC and spectral  
237 behaviour analyses indicated that xanthommatin and its reduced form, di-  
238 hydroxanthommatin, are the autofluorescent ommochromes distributed along the wing  
239 spot veins (as shown by confocal microscopy; Fig. 2d and 2e). It is possible that ommatin  
240 D or rhodommatin are also present but that our pigment extraction method caused these  
241 pigments to spontaneously degrade into xanthommatin<sup>9,23</sup>. TLC also revealed the  
242 presence of 3-Hk in the RWS. The participation of 3-Hk as a reddish pigment in insects is  
243 possible, as it was previously reported in red wing regions of lepidopterans<sup>23</sup> and in the  
244 cuticle of *Bombyx mori*<sup>24</sup>. Nonetheless, its presence in *H. americana* wings was so dim  
245 that a slight band was hardly discernible (Fig.1b).

246 To our knowledge this is the first time that ommochromes have been observed by  
247 confocal microscopy techniques, taking advantage of the ommochromes' property of  
248 autofluorescence when excited at a certain wavelength (561nm). This approach to reveal  
249 insect ommochromes could be complementary with other microscopy techniques  
250 previously used to observe these pigments, such as electronic microscopy, which has  
251 actually allowed the identification of the special organelles where ommochromes are  
252 produced, known as ommochromasomes<sup>18</sup>.

253 In odonates, ommochromes have been found in the cuticle of some members of the  
254 dragonfly genera *Sympetrum* and *Crocothemis*, where these compounds are related to  
255 sexual dimorphism, maturation patterns and antioxidant capacity<sup>10</sup>. Ommochromes in  
256 other taxa are also versatile pigments involved in several functions and not only colour

257 production. Ommochromes are found in the eyes of insects<sup>18</sup> and to a lesser extent, in  
258 other structures such as the wings of some lepidopterans<sup>23</sup>. Functionally, ommochromes  
259 are crucial in processing visual information in the insect compound eye<sup>9</sup>, and they are  
260 suitable for transporting electrons or reacting with oxidants, reducers and free radicals<sup>25</sup>.  
261 Notwithstanding, as evidenced by our survival experiment, tryptophan and its metabolites  
262 (including 3-Hk) are toxic at high concentrations in all insects<sup>9,26</sup>. This dangerous  
263 situation can occur due to important phenotypic changes during insects' life cycles, for  
264 example, during molting<sup>9,26</sup>. Ommochromes are also thought to be end-products of  
265 tryptophan detoxification<sup>9</sup>. In fact, both 3-Hk and ommochrome pigments are found at  
266 high concentrations in the meconium of holometabolous insects, a waste product from the  
267 pupal stage<sup>19</sup>. While some of these hemimetabolous insects, such as locusts, get rid of  
268 the toxic tryptophan by converting it to ommochromes and excreting it in faeces<sup>12</sup>  
269 storage of toxic byproducts in the form of ommochromes could be of particular relevance  
270 for detoxification in insects lacking pupation (i.e. hemimetabolous insects) such as our  
271 study animal and allied taxa. Nevertheless, this idea needs further testing.  
272 Despite that our survival experiment shows that 3-Hk impairs survival when we  
273 estimated the LC<sub>50</sub>, this tryptophan metabolite affected the expression of the sexual trait  
274 in our animal model, resulting in an increment of red pigmentation in wings of male  
275 treated with 3-Hk compared to Control and Sham males. This result in combination with  
276 the lack of survival differences between Sham and 3-Hk males may support the idea that  
277 wing ommochromes may mitigate the toxicity of 3-HK. The increase in red pigmentation  
278 found in males treated with 3-Hk can be explained by several enzymatic and spontaneous  
279 reactions that may participate in a few metabolic processes, such as kynurenine-3-

280 monooxygenase, which takes place during 3-Hk formation, or phenoxazone synthase, and  
281 has a role in ommochrome formation. Nonetheless, the physiological and molecular  
282 mechanisms that underlie the metabolic pathways from tryptophan metabolites to  
283 ommochromes are poorly known in biochemical terms to clarify ommochrome  
284 biosynthesis<sup>18</sup>. Interestingly, our experimental manipulation with 3-Hk did not impact  
285 the area of the RWS. Previous works in our study species have provided evidence that  
286 this feature correlates with male energetic condition during aerial contests over mating  
287 territories<sup>21,27</sup>. Thus, one explanation for our results is that by making the spot appear  
288 red, serves as the information signal that a territorial male need to convey to his  
289 conspecific and heteroespecific rivals during territorial tenure. This is compatible with a  
290 previous experiment in which the red spot was manipulated to appear blue (without  
291 manipulating spot area) in male territory holders<sup>28</sup>. This change elicited high levels of  
292 aggression by rivals towards “blue spot” males, showing that it is red coloration but not  
293 spot area alone that is perceived as a the first signal of territoriality<sup>28</sup>.

294 The honest signalling theory indicates only individuals in good condition (e.g. healthy)  
295 are able to afford the costs of generating and maintaining sexual signals<sup>29,30</sup>. Food,  
296 parasites and free radicals are the main drivers of these signals<sup>30-33</sup>. In this sense, our  
297 study indicates that ommochrome-pigmented sexual traits in *H. americana* males could  
298 act as honest indicator of nutritional condition, which is correlated with excretion ability.  
299 According to this, only males that acquire sufficient protein in their diets to require  
300 tryptophan detoxification and are able to use an effective detoxification mechanism to  
301 convert and excrete it as red ommochrome pigment will produce sufficient amounts of  
302 metabolic products to develop the red signal, which indicates this quality to rivals, and



303 therefore gives them an advantage in acquiring and maintaining a mating territory. In this  
304 sense, the detoxification mechanism could have initially evolved because the production  
305 of ommochromes was an effective mechanism for dealing with metabolic waste products,  
306 and then became co-opted by sexual selection when these ommochromes were allocated  
307 to wings and indicated male nutritional condition to rivals. It is not that rivals assess the  
308 detoxification ability, but rather how much energy a rival has to utilize during aerial  
309 contests for territories. Given these metabolic processes and sexual selection  
310 mechanisms, individuals cannot “cheat” the system. This hypothesis—which we call here  
311 detoxifying ability signalling—should be tested in other pigments that are used in sexual  
312 selection contexts (one example is the case of butterfly pteridines <sup>34</sup>). Interestingly,  
313 ommochromes in their reduced form are important antioxidants <sup>35</sup> and may combat  
314 oxidative stress, a situation that was recently shown in our study species <sup>36</sup>. Thus, by  
315 reducing ommochrome toxicity, males may also benefit in terms of dealing with  
316 oxidative stress. This three-fold function – detoxification, antioxidant ability, and sexual  
317 signalling – provide support for a metabolic efficiency mechanism that could be informed  
318 through the expression of these colourful pigments.

319

320

321

322

323

324

325

## 326 **Methods**

### 327 **Animals**

328 Adult male *H. americana* were captured in the riverine areas of the Tetlama River,  
329 Morelos, Mexico (18° 45' 55''N, 99° 14' 45'' W) with a butterfly net between 10.00 and  
330 16.00h, the time at which males are most active<sup>37</sup>. Males were aged according to three  
331 visual categories<sup>38</sup>: 1) juvenile males, bearing soft, dorso-ventrally flexible, undamaged  
332 wings with a small and incompletely formed RWS; 2) sexually mature males, with less  
333 flexible wings, fully fixed red wing spot and no signs of thoracic pruinescence (Fig. 1a),  
334 and 3) old males, with abundant thoracic pruinescence and inflexible, damaged or worn  
335 wings with the same RWS size as sexually mature males. Given that animals from the  
336 second category have a better physiological condition and will remain alive for a longer  
337 period from the time of capture<sup>28</sup>, we only used sexually mature males.

338

### 339 **1. Presence of ommochromes in the RWS of *H. americana* males**

#### 340 *1.1. Pigment extraction*

341 To determine whether ommochrome pigments are present in the RWS, we sacrificed 30  
342 adult males by freezing for 20 minutes at -20°C soon after collection. These animals were  
343 then dried in a drying oven (Heratherm-ThermoFisher) for 24 hours at 30°C. The four  
344 wings were removed from each dried male, but only the RWS from the forewings was  
345 used. To extract the red pigment from the forewings we used the methodology proposed  
346 by Nijhout<sup>23</sup>, with some modifications from Riou and Christidès<sup>11</sup>. All spots were pooled  
347 and homogenized in methanol at 4°C and centrifuged for 5 minutes at 14,000 g. Then, the  
348 precipitate was washed twice with 99% methanol and three times with ethyl ether by

349 repeated suspension and centrifugation (5 minutes at 14,000g). After the ethyl ether was  
350 evaporated from the final precipitate, 4 ml of acidic methanol (100% methanol plus 0.5%  
351 hydrochloric acid) were added to the residue and the suspension was centrifuged for 10  
352 minutes at 14,000 g. After centrifugation, the supernatant was concentrated to one-quarter  
353 of its volume using a vacuum concentrator (SpeedVac-Thermo®, Mod. ISS110). We  
354 added 2 ml of distilled water and SO gas to this solution and, after incubating overnight  
355 for 8 hours at 2 °C, the red pigment obtained was precipitated by centrifugation for 10  
356 min at 14,000 g and washed with a 2 mL of cold water. The sample was then dried in a  
357 drying oven (Heratherm-ThermoFisher) at 28°C until water evaporated. The powder  
358 obtained was used to determine the nature of the red wing pigment.

359

## 360 *1.2.Pigment determination*

361 We performed four complementary methods to evaluate presence of ommochromes via  
362 their biochemical properties: Redox behaviour, spectral absorbance, thin layer  
363 chromatography and autofluorescence by confocal microscopy.

364

### 365 *1.2.1. Redox behaviour and spectral absorbance*

366 The most conspicuous property of ommochromes is their reduction-oxidation behaviour  
367 (i.e. Redox), which is observed by a colour change from red when reduced to yellow  
368 when oxidized<sup>9</sup>. Hence, we evaluated whether our red powder changed colour when it  
369 was subjected to reductant or oxidant conditions. The red spot powder was dissolved in  
370 phosphate buffer (0.067 M, pH 8.5) containing 10 µL of 1% ascorbic acid as a reductant  
371 component to observe the resulting colour. Next, we added 10 µL of 1% NaNO<sub>2</sub> as an

372 oxidant component and the colour changes were observed. Finally, we again added 10  $\mu$ L  
373 of 1% ascorbic acid to test whether the colour reverted to its previous state.  
374 Complementary with this Redox behaviour, all ommochromes have a particular spectral  
375 behaviour, which is characterized by 2 to 4 spectral peaks, distributed throughout the UV  
376 and visible ranges of the spectrum<sup>9,39</sup>. These spectral peaks have been traditionally  
377 characterized when ommochromes are dissolved in both phosphate buffer (pH 7.0) and  
378 5N HCl<sup>23,40</sup>. Therefore, to determine whether our red powder showed the typical spectral  
379 behaviour of ommochromes, we measured the spectral peaks when the red powder was  
380 dissolved in these solvents. To accomplish this, we prepared two different solutions using  
381 20  $\mu$ g of the red powder and 100  $\mu$ L of phosphate buffer or 5N HCl. Given that spectral  
382 peaks of the ommochrome xanthommatin are the best characterized by previous studies  
383<sup>9,18</sup>, we processed the samples to convert any ommochromes that could be present in the  
384 RWS powder (e.g. ommatin D or dihydroxanthommatin) into xanthommatin. This  
385 conversion allows us to ensure the specificity in the resulting peaks. For this purpose, in  
386 the case of the phosphate buffer, the solution was refrigerated at 4°C for 12 hours, while  
387 the 5N HCl solution was kept at 25 °C in a drying oven (Heratherm-ThermoFisher) for 5  
388 days<sup>40</sup>. After this period, both solutions were centrifuged (14,000 g for 5 min) and the  
389 absorbance of the supernatant was measured from 220-600 nm wavelength using a  
390 spectrophotometer (Hitachi, Mod. U-3900). Finally, we compared the spectral peaks  
391 obtained in both solvents with those described by Nijhout<sup>23</sup>, who used the same solvents  
392 to evaluate spectral peaks of ommochromes extracted from the ventral hind wing pattern  
393 of the *linea* and *rosa* forms of the lepidopteran *Precis coenia*<sup>23</sup>.  
394

395 *1.2.2 Thin layer chromatography (TLC)*

396 TLC is a technique that allows the separation and characterization of ommochromes from  
397 insects when these pigments are present <sup>23</sup>. For this purpose, we used a 10x20 cm silica  
398 gel plate (Merck, Darmstadt, Germany, Silica Gel 60 F254). This plate was divided into 4  
399 channels (2 cm between channels). The division was made from the narrower side of the  
400 plate (10 cm) and a thin base line was drawn with a pencil at 1 cm from the bottom of the  
401 plate in each channel. At this base line, we added 10  $\mu$ L from the wing spot red powder  
402 that was previously diluted in acidic methanol (1 mL <sup>23</sup>), and the plate was left in a  
403 vertical position in a chromatographic chamber (Aldrich). The chamber was previously  
404 saturated with a developing solvent of phenol:water (3:1 by volume) using a small piece  
405 of filter paper (JM 3639, JoyLab) around the chamber. The silica gel plate was left inside  
406 the chamber for 2 hours to allow the complete separation of pigments. After this time, we  
407 identified the bands formed along the plate in both ultraviolet and visible light spectrum  
408 using an UV/White transilluminator (Safe Imager 2.0, Invitrogen). Then, we measured  
409 the distance (mm) at which these bands were located with respect to the base line as well  
410 as the distance travelled by the developing solvent in each channel, and we obtained an  
411 average value for each band and for the solvent. These distances were used to obtain the  
412 retention factor ( $R_f$ ) for each pigment found. Finally, to determine whether any  $R_f$   
413 obtained in our sample corresponded to ommochrome pigments, these values were  
414 compared with the  $R_f$  of authentic synthetic ommochromes previously reported from the  
415 same silica gel/phenol TLC system <sup>23</sup>, since there are no commercially available  
416 ommochrome standards available to date <sup>18</sup>.  
417

418 1.2.2. *Autofluorescence analysis*

419 The presence of indole groups in the chemical structure of all ommochromes gives them  
420 the property of autofluorescence at certain wavelengths<sup>9</sup>. This biochemical feature is a  
421 helpful way to determine the nature of certain colours in insects, since only red pigments  
422 derived from ommochromes and aphins (i.e. a pigment only present in aphids and not in  
423 any other insects<sup>41</sup>) will show this property<sup>9,42</sup>. Therefore, one last complementary test  
424 to determine whether ommochromes are present in the RWS of *H. americana* was to  
425 observe autofluorescence induced by excitation with specific laser lines and evaluated  
426 with a spectral detector using multiphoton microscopy. To accomplish this, five  
427 forewings from adult males were carefully mounted onto pre-cleaned microscope slides  
428 (Lauka, CDMX, México) and covered with 0.17mm thick 180 x 180 mm coverslips.  
429 Then, the edges of the coverslip were carefully sealed to the slide with nail hardener and  
430 slides were kept at room temperature until imaging. Bright field tile imaging was carried  
431 out with an upright microscope (Olympus BX51-WI, Olympus Corporation, Tokyo,  
432 Japan) equipped with an XYZ motorized stage (MAC6000, Ludl Electronic Products,  
433 Ltd., Hawthorne, NY, USA), an RGB CCD camera (MBF CX9000, MBF Bioscience,  
434 Williston, VT, USA) and StereoInvestigator software (v. 9.0.1, MBF Bioscience).  
435 Imaging was done using a UPLAN FL N 10X N.A. objective. To visualize the  
436 autofluorescence produced by the red wing spot, we acquired XYZλ images from both  
437 pigmented and non-pigmented regions of the same wing with a Nikon A1R<sup>+</sup> laser  
438 confocal scanning head coupled with an Eclipse Ti-E inverted microscope (Nikon  
439 Corporation, Tokyo, Japan) equipped with a motorized stage (TI-S-E, Nikon). We thus  
440 excited the samples using four lasers of different wavelengths: 405 (2mW), 488 (70mW),

441 561 (1.4mW) and 647 nm (1.25mW). We evaluated the resulting signals using a 32-  
442 channel spectral detector (10 nm resolution, from 425 to 735 nm wavelength) plus a  
443 transmitted light detector. The pinhole value was set at 29.4  $\mu\text{m}$  for all lasers. Images  
444 were captured with NIS Elements C software v. 4.50 (Nikon); and XYZ resulting  
445 images were converted to single-plane images by applying maximum intensity  
446 projections (MIP) in order to show the brightest fluorescence information for all Z planes  
447 for all wavelengths at a glance with the same software.

448 Finally, fluorescence single plane tile imaging of the forewings was done with a CFI Plan  
449 Fluor 10X N.A. 0.3 objective, using 7mW of 561nm laser power, pinhole aperture of  
450 195.4 $\mu\text{m}$ , and a GaAsP detector, all controlled through NIS Elements C software v4.50  
451 (Nikon).

452

## 453 **2. Toxic effects of 3-Hk in *H. americana* males**

454 Given that 3-Hk has been reported to be fatal to insects<sup>15</sup>, we evaluated whether this  
455 substance kills *H. americana* males. We performed an experiment in captivity to  
456 calculate the median lethal concentration (LC<sub>50</sub>) of 3-Hk. For this, 3-Hk (Sigma-Andrich;  
457 Catalogue number: 2147-61-7) was dissolved in distilled water using a vortex mixer for  
458 10 minutes. Five different 3-Hk concentrations were injected into 75 adult males (15 per  
459 group): 0 (only distilled water), 1, 100, 1000 and 10,000  $\mu\text{g mL}^{-1}$ . The injection took  
460 place in the dorsal thoracic region, where the wings are inserted. Animals received 4 $\mu\text{L}$  of  
461 each 3-Hk concentration using a microsyringe (10  $\mu\text{L}$ , Hamilton 80330; Hamilton, Reno,  
462 Nevada). Individual manipulation lasted no more than 1 min. Males were then placed  
463 individually into transparent plastic 5-mL assay tubes (Simport, Canada) with a piece of

464 wood as a perch, moist pieces of cotton to provide humidity and a temperature of 26 °C  
465 inside the tubes. Males were not fed during the experiment and conditions of captivity  
466 were always the same. Twenty-four hours after injection, male mortality was recorded for  
467 each of the five groups. This survival experiment concluded that 3-Hk is toxic for adult  
468 males of *H. Americana*; the LC<sub>50</sub> we determined for this species which was estimated at  
469 368.69µg mL<sup>-1</sup> (C.I 95%: 78.5- 1729.9µg mL<sup>-1</sup>; See results section for further details).

470

### 471 **3. Mitigation of 3-Hk toxic effects by deposition of ommochromes in RWS**

472 To evaluate whether males are able to counteract the toxic effect of 3-Hk by depositing  
473 ommochromes into their wings, forming the red wing spots, we performed another  
474 captivity experiment administrating 3-Hk in males, then determining whether the  
475 ommochromes were subsequently deposited into their RWS. To accomplish this, 54 adult  
476 males were captured and randomly allocated to three different treatments: 1) 3-Hk  
477 treatment (N=20 males injected with 363µg of 3-Hk diluted in 4 µL of PBS 1x—the  
478 previously estimated LC<sub>50</sub>), 2) Sham treatment (N=17 males injected with 4 µL of PBS  
479 1X), and 3) Control treatment (N=17 males with no manipulation). After manipulation,  
480 males were monitored in captivity every 4 h to record the time to death, and the  
481 experiment ended when the last male died. Captivity conditions were the same as those  
482 used to calculate the LC<sub>50</sub>. After the last male died, the anterior wings from all  
483 individuals were removed from the body. The effect of 3-Hk on wing red pigmentation  
484 was evaluated by two complementary techniques: 1) quantification of red chroma (*Rc*) by  
485 spectrophotometry (see also <sup>21</sup>), and 2) the relative fluorescence (*Rf*) by confocal  
486 microscopy. The red chroma of RWS from the different treatments was calculated as the



487 proportion of total reflectance (from 360 to 740 nm) occurring in red wavelengths (600-  
488 700 nm) using a spectrophotometer (MINOLTA CR-200, Konica Sensing Inc., Osaka,  
489 Japan; for a similar procedure see <sup>28</sup>).

490 *Rf* was determined from confocal XYZ images obtained from a random sample of 10  
491 forewings from males of each treatment. Laser scanning confocal microscope Z-stack  
492 images (512x512 pixels, 12-bits, 3  $\mu$ m interval) were acquired with a CFI Plan Fluor,  
493 10X, N.A. 0.3 objective, using 1.4mW of 561nm laser power for excitation, pinhole  
494 aperture of 20.43  $\mu$ m, emission filter 595/50, and a GaAsP detector, all controlled  
495 through NIS Elements C software v4.50 (Nikon). Z-images were then processed using  
496 Image J software <sup>43</sup>, performing a Z-projection with the pixels obtained from maximum  
497 intensity projection (MIP) as the reference. The MIP image was converted from 12 to 8-  
498 bits and a histogram of the pixel intensity value was extracted. *Rf* value from each Z-  
499 projection was calculated by multiplying the intensity value of the histogram with its  
500 corresponding number of pixels then dividing by the total number of pixels present in  
501 each image (262144 pixels <sup>43</sup>). Finally, *Rf* value of all Z- projections were averaged to  
502 obtained a unique *Rf* value per individual.

503

#### 504 **4. Statistical analyses**

505 To determine whether ommochromes are responsible for the male RWS we qualitatively  
506 analyzed the biochemical properties previously mentioned: redox behaviour, spectral  
507 absorbance, *Rf* of purified ommochromes, and autofluorescence. To evaluate whether 3-  
508 Hk, the precursor of ommochrome pigments, is a toxic tryptophan metabolite for adult  
509 males, we performed a survival analysis to calculate the LC<sub>50</sub> for these males through the

510 Trimmed Spearman-Kärber method <sup>44</sup>. We included in the model the following  
511 predictors: treatment (3-Hk, Sham, and Control), wing length, RWS area, and their  
512 interactions. Analysis was done in R <sup>45</sup> using the tsk package <sup>46</sup>.

513 To evaluate whether males of *H. americana* are able to counteract the toxic effect of 3-  
514 Hk by depositing ommochrome in their RWS, we evaluated both the survival differences  
515 between treatments (i.e. 3-Hk, sham, and control) and the differences in colour properties  
516 of *Rc* and *Rf*. Survival after treatment was evaluated with a Cox proportional hazard  
517 regression, whose predictors were the additive effects of treatment and wing length (a  
518 proxy of body size <sup>28</sup>. This model was simplified based on AIC values to obtain the best  
519 supported model (i.e. the model with the lowest AIC-value).

520 To determine differences in *Rc* and *Rf* we used linear mixed and linear models  
521 respectively. For *Rc* the predictor variables were treatment, survival time, wing length,  
522 RWS area and the interactions treatment\*survival time, treatment\*wing length and  
523 treatment\*RWS. Given that *Rc* was measured for both the left and right forewings of  
524 each damselfly, individual identity was included as a random effect in this analysis. For  
525 the case of *Rf* we used the same predictors as for *Rc*. The initial models were reduced  
526 based on AIC and the best supported model is reported. *P*-values of the predictor  
527 variables and interactions were obtained using likelihood ratio tests for *Rc* and with F  
528 tests for *Rf*. Variance homogeneity was tested using the Fligner-Killeen test, normality of  
529 residuals was inspected visually from normal q-q plots and the presence of outliers was  
530 evaluated with Cook's distances (none were found—all Cook's distances<1). All  
531 analyses were done in R software <sup>45</sup> according to Crawley <sup>47</sup> and Zuur and collaborators  
532 <sup>48</sup>.

533

534

535

536 **Data availability**

537 All data are available from the corresponding author on reasonable request.

538

539 **Acknowledgements**

540 We are grateful to Ana Rivas-Caicedo for her advice on the microscopy techniques  
541 implemented in the present study. We thank Roberto Arreguín Espinosa to his advice on  
542 pigment determination. We thank Fernanda Baena for helpful discussion and fieldwork.  
543 We also thank Lynna Marie Kiere for her style revision and thoughtful comments, and  
544 Osiris Gaona for helpful discussion. This project was funded by UNAM-PAPIIT [grant  
545 numbers IA207019 and IN204610] and CONACYT Ciencia Básica [grant number  
546 241744].

547

548 **Author contributions**

549 I.G.-S conceived this study. All authors designed this study. I.G.-S., and D. G.-T.  
550 collected fieldwork data, M.T.-R. collected and analyzed microscopy data, I.G.-S. and D.  
551 G.-T. analyzed all data. All authors contributed in writing the first draft and approved the  
552 final version of the manuscript.

553

554 **Competing interest.**

555 We declare that the authors have no competing interests as defined by Nature Research or  
556 other interests that might be perceived to influence the results and/or discussion reported  
557 in this paper.

558

### 559 **Additional information**

560 Supplementary information is available for this paper upon correspondence and requests  
561 for materials should be addressed to I.G.-S or A.C.-A.

562

### 563 **References**

- 564 1. Cochran, D. *Insect biochemistry and function*. (Springer-Science business media,  
565 1975).
- 566 2. Timmerman, S. & Berenbaum, M. Uric acid deposition in larval integument of  
567 black swallowtails and speculation on its possible functions. *J. Lepid. Soc.* **53**,  
568 104–107 (1999).
- 569 3. Andersson, M. Sexual selection. (1994).
- 570 4. Zera, A. J. & Harshman, L. G. The physiology of life history trade-offs in animals.  
571 *Annu. Rev. Ecol. Syst.* **32**, 95–126 (2001).
- 572 5. Vukusic, P., Chittka, L. & Chapman, R. F. Visual signals: color and light  
573 production. in *The Insects: structure and function* (eds. Chapman, R., Simpson, S.  
574 & Douglas, A.) 793–823 (Cambridge University Press, 2013).  
575 doi:10.1017/cbo9781139035460.032.
- 576 6. von Schantz, T., Bensch, S., Grahn, M., Hasselquist, D. & Wittzell, H. Good  
577 genes, oxidative stress and condition-dependent sexual signals. *Proceedings. Biol.*

- 578           *Sci.* **266**, 1–12 (1999).
- 579    7.    McGraw, K. J. The antioxidant function of many animal pigments: are there  
580           consistent health benefits of sexually selected colourants? *Anim. Behav.* **69**, 757–  
581           764 (2005).
- 582    8.    Monaghan, P., Metcalfe, N. B. & Torres, R. Oxidative stress as a mediator of life  
583           history trade-offs: mechanisms, measurements and interpretation. *Ecol. Lett.* **12**,  
584           75–92 (2009).
- 585    9.    Linzen, B. The Tryptophan → Ommochrome Pathway in Insects. *Advances in*  
586           *Insect Physiology* 117–246 (1974) doi:10.1016/s0065-2806(08)60130-7.
- 587    10.   Futahashi, R., Kurita, R., Mano, H. & Fukatsu, T. Redox alters yellow dragonflies  
588           into red. *Proc. Natl. Acad. Sci. U. S. A.* **109**, 12626–12631 (2012).
- 589    11.   Riou, M. & Christidès, J.-P. Cryptic Color Change in a Crab Spider (*Misumena*  
590           *vatia*): Identification and Quantification of Precursors and Ommochrome Pigments  
591           by HPLC. *J. Chem. Ecol.* **36**, 412–423 (2010).
- 592    12.   Chapman, R. *The Insects: Structure and Function*. (Cambridge University Press,  
593           1998).
- 594    13.   Kayser, H. Ommochrome formation and kynurenine excretion in *Pieris brassicae*:  
595           Relation to tryptophan supply on an artificial diet. *J. Insect Physiol.* **25**, 641–646  
596           (1979).
- 597    14.   Connolly, K., Burnet, B. & Sewell, D. Selective Mating and Eye Pigmentation: An  
598           Analysis of the Visual Component in the Courtship Behavior of *Drosophila*  
599           *melanogaster*. *Evolution (N. Y.)*. **23**, 548 (1969).
- 600    15.   Cerstiaens, A. *et al.* Neurotoxic and neurobehavioral effects of kynurenines in

- 601 adult insects. *Biochem. Biophys. Res. Commun.* **312**, 1171–1177 (2003).
- 602 16. Oxenkrug, G. F. The extended life span of *Drosophila melanogaster* eye-color  
603 (white and vermilion) mutants with impaired formation of kynurenine. *J. Neural*  
604 *Transm.* **117**, 23–26 (2010).
- 605 17. Oxenkrug, G. F., Navrotskaya, V., Voroboyva, L. & Summergrad, P. Extension of  
606 life span of *Drosophila melanogaster* by the inhibitors of tryptophan-kynurenine  
607 metabolism. *Fly (Austin)*. **5**, 307–309 (2011).
- 608 18. Figon, F. & Casas, J. Ommochromes in invertebrates: biochemistry and cell  
609 biology. *Biol. Rev.* **94**, 156–183 (2019).
- 610 19. Ogawa, H. & Hasegawa, K. Kynureninase and its activity during metamorphosis  
611 of the silkworm, *Bombyx mori*. *Insect Biochem.* **10**, 589–593 (1980).
- 612 20. Hooper, R. E., Tsubaki, Y. & Siva-Jothy, M. T. Expression of a costly, plastic  
613 secondary sexual trait is correlated with age and condition in a damselfly with two  
614 male morphs. *Physiol. Entomol.* **24**, 364–369 (1999).
- 615 21. Contreras-Garduno, J., Buzatto, B. A., Serrano-Meneses, M. A., Najera-Cordero,  
616 K. & Cordoba-Aguilar, A. The size of the red wing spot of the American rubyspot  
617 as a heightened condition-dependent ornament. *Behav. Ecol.* **19**, 724–732 (2008).
- 618 22. Córdoba-Aguilar, A. & González-Tokman, D. M. The Behavioral and  
619 Physiological Ecology of Adult Rubyspot Damselflies (*Hetaerina*, Calopterygidae,  
620 Odonata). *Advances in the Study of Behavior* 311–341 (2014) doi:10.1016/b978-0-  
621 12-800286-5.00007-9.
- 622 23. Nijhout, H. Ommochrome pigmentation of the linea and rosa seasonal forms of  
623 *Precis coenia* (Lepidoptera: Nymphalidae). *Arch. Insect Biochem. Physiol.* **36**,

- 624 215–222 (1997).
- 625 24. Meng, Y., Katsuma, S., Mita, K. & Shimada, T. Abnormal red body coloration of  
626 the silkworm, *Bombyx mori*, is caused by a mutation in a novel kynureninase.  
627 *Genes to Cells* **14**, 129–140 (2009).
- 628 25. Needham, A. *The Significance of Zoochromes*. (Springer, 1974).
- 629 26. Manoukas, A. Effect of excess levels of individual amino acids upon survival,  
630 growth and pupal yield of *Dacus oleae* (Gmel.) larvae. *Zeitschrift für Angew.*  
631 *Entomol.* **91**, 309–315 (1981).
- 632 27. Grether, G. F. Survival cost of an intrasexually selected ornament in a damselfly.  
633 *Proc. R. Soc. London. Ser. B Biol. Sci.* **264**, 207–210 (1997).
- 634 28. González-Santoyo, I., González-Tokman, D. M., Munguía-Steyer, R. E. &  
635 Córdoba-Aguilar, A. A mismatch between the perceived fighting signal and  
636 fighting ability reveals survival and physiological costs for bearers. *PLoS One* **9**,  
637 e84571–e84571 (2014).
- 638 29. Zahavi, A. Mate selection—A selection for a handicap. *J. Theor. Biol.* **53**, 205–  
639 214 (1975).
- 640 30. Hamilton, W. & Zuk, M. Heritable true fitness and bright birds: a role for  
641 parasites? *Science (80-. )*. **218**, 384–387 (1982).
- 642 31. Sheldon, B. C. & Verhulst, S. Ecological immunology: costly parasite defences  
643 and trade-offs in evolutionary ecology. *Trends Ecol. Evol.* **11**, 317–321 (1996).
- 644 32. Montoya, B., Valverde, M., Rojas, E. & Torres, R. Oxidative stress during  
645 courtship affects male and female reproductive effort differentially in a wild bird  
646 with biparental care. *J. Exp. Biol.* **219**, 3915–3926 (2016).

- 647 33. Olzer, R., Ehrlich, R., Heinen-Kay, J., Tanner, J. & Zuk, M. Reproductive  
648 behavior. in *Insect Behavior: from mechanisms to ecological and evolutionary*  
649 *consequences* 189–202 (2018).
- 650 34. Tigreros, N., Mowery, M. A. & Lewis, S. M. Male mate choice favors more  
651 colorful females in the gift-giving cabbage butterfly. *Behav. Ecol. Sociobiol.* **68**,  
652 1539–1547 (2014).
- 653 35. Futahashi, R. Color vision and color formation in dragonflies. *Curr. Opin. Insect*  
654 *Sci.* **17**, 32–39 (2016).
- 655 36. Martínez-Lendech, N., Golab, M. J., Osorio-Beristain, M. & Contreras-Garduño, J.  
656 Sexual signals reveal males' oxidative stress defences: testing this hypothesis in an  
657 invertebrate. *Funct. Ecol.* **32**, 937–947 (2018).
- 658 37. Contreras-Garduño, J., Canales-Lazcano, J. & Córdoba-Aguilar, A. Wing  
659 pigmentation, immune ability, fat reserves and territorial status in males of the  
660 rubyspot damselfly, *Hetaerina americana*. *J. Ethol.* **24**, 165–173 (2006).
- 661 38. Plaistow, S. & Siva-Jothy, M. Energetic constraints and male mate-securing tactics  
662 in the damselfly *Calopteryx splendens xanthostoma* (Charpentier). *Proc. R. Soc.*  
663 *London. Ser. B Biol. Sci.* **263**, 1233–1239 (1996).
- 664 39. Bolognese, A., Liberatore, R., Riente, G. & Scherillo, G. Oxidation of 3-  
665 hydroxykynurenine. A reexamination. *J. Heterocycl. Chem.* **25**, 1247–1250  
666 (1988).
- 667 40. Umebachi, Y. & Uchida, T. Ommochromes of the testis and eye of *Papilio xuthus*.  
668 *J. Insect Physiol.* **16**, 1797–1812 (1970).
- 669 41. Shamim, G., Ranjan, S. K., Pandey, D. M. & Ramani, R. Biochemistry and



- 670 biosynthesis of insect pigments. *Eur. J. Entomol.* **111**, 149–164 (2014).
- 671 42. Insausti, T. C. & Casas, J. The functional morphology of color changing in a  
672 spider: development of ommochrome pigment granules. *J. Exp. Biol.* **211**, 780–  
673 789 (2008).
- 674 43. Abramoff, M., Magalhaes, P. & Ram, S. Image processing with ImageJ.  
675 *Biophotonics Int.* **11**, 36–42 (2004).
- 676 44. Hamilton, M. A., Russo, R. C. & Thurston, R. V. Trimmed Spearman-Kärber  
677 method for estimating median lethal concentrations in toxicity bioassays. *Environ.*  
678 *Sci. Technol.* **11**, 714–719 (1977).
- 679 45. R Core Team. R: A Language and Environment for Statistical Computing. (2019).
- 680 46. Stone, B. R. *tsk: Trimmed Spearman-Kärber Method*. (2012).
- 681 47. Crawley, M. J. *The R Book Second Edition*. (Wiley, 2012).
- 682 48. Zuur, A. F., Ieno, E. N., Walker, N., Saveliev, A. A. & Smith, G. M. Mixed effects  
683 models and extensions in ecology with R. *Statistics for Biology and Health* (2009)  
684 doi:10.1007/978-0-387-87458-6.
- 685
- 686
- 687
- 688
- 689
- 690
- 691
- 692

693

## Supplementary figures

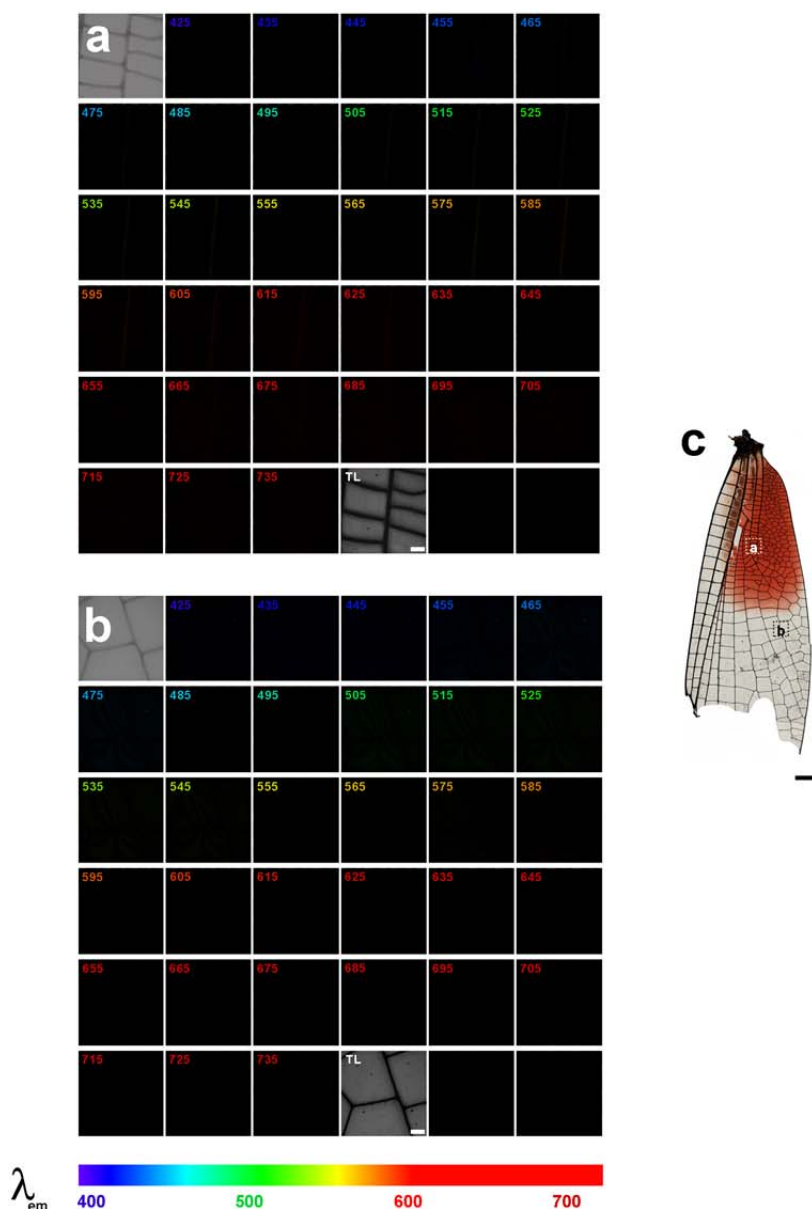

694 **Figure S1a.** Fluorescence XYZ scans (425-735 nm) of *Hetaerina americana* wing  
695 excited at 405 nm. Maximum intensity projection images of (a) a sub-region of the red-  
696 pigmented area, and (b) a sub-region of the transparent area, depicted in (c). A relatively  
697 weak fluorescence intensity was found in wing veins of the anterior region from 505 to  
698 725 nm (a). In contrast, no apparent signal is present in wing veins but in the wing  
699 between 465-615 nm in the medial region of dragonfly wing (b). Scale bar: 100  $\mu$ m.

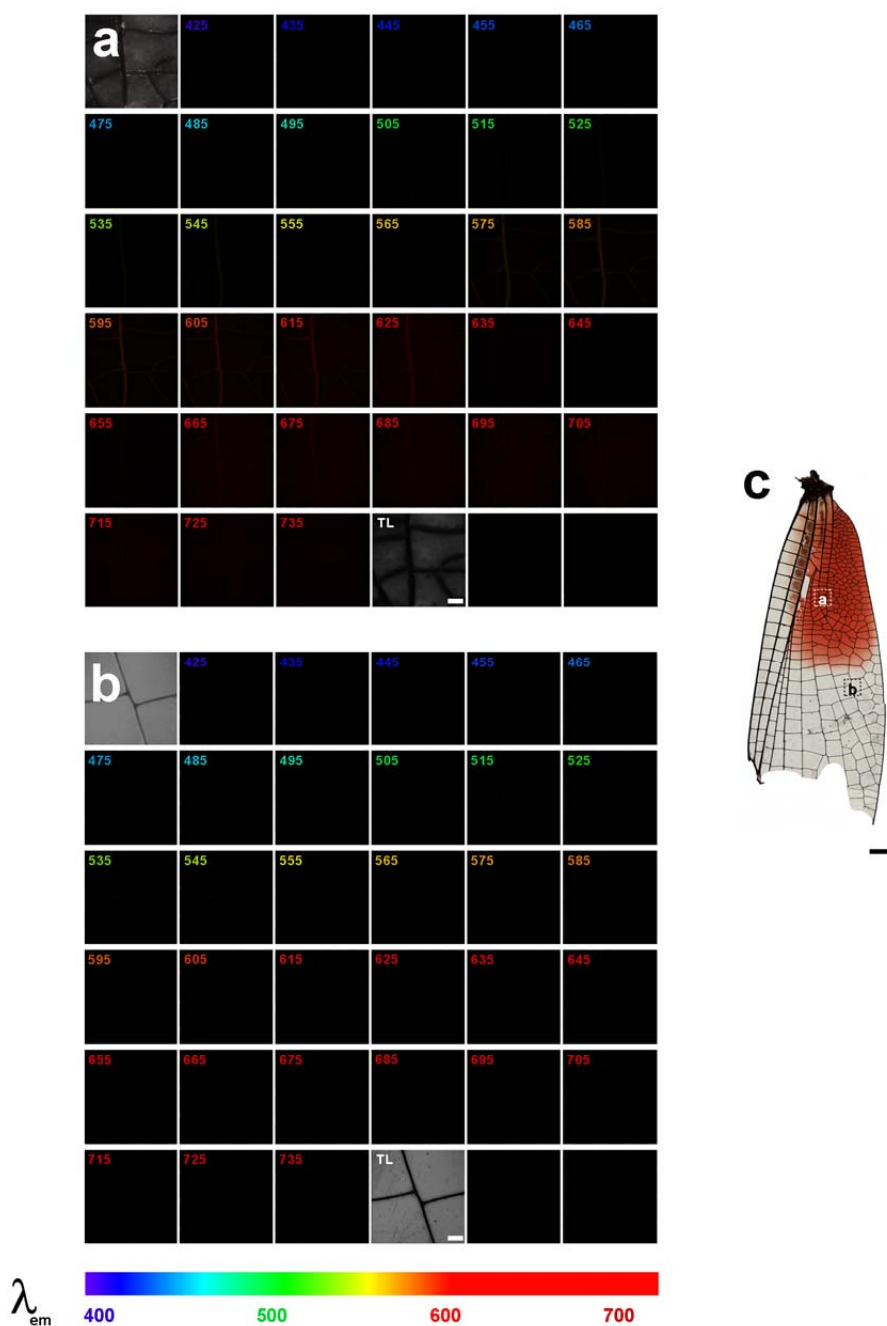

700 **Figure S1b.** Fluorescence Zλ scans (425-735 nm) of *Hetaerina americana* wing excited  
701 at 488 nm. Maximum intensity projection images of (a) a sub-region of the red-  
702 pigmented area, and (b) a sub-region of the transparent area, depicted in (c). A relatively

703 weak fluorescence intensity was found in the wing veins of the anterior region from 505  
704 to 735 nm (a). In contrast, no apparent signal is present in the medial region of the  
705 damselfly wing (b). Scale bar: 100  $\mu$ m.

706

707

708

709

710

711

712

713

714

715

716

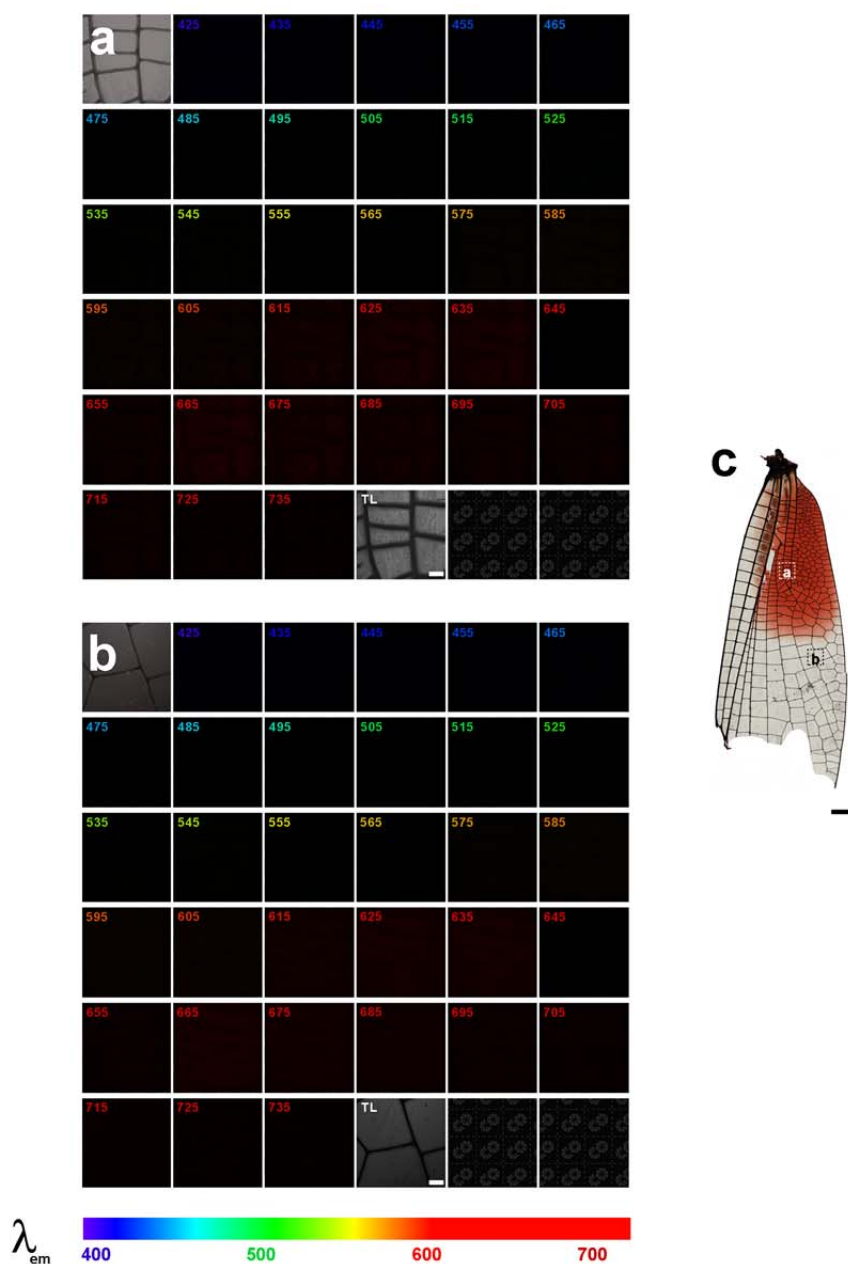

717  
718 **Figure S1c.** Fluorescence  $Z\lambda$  scans (425-735 nm) of *Hetaerina americana* wing excited  
719 at 646 nm. Maximum intensity projection images of (a) a sub-region of the red-  
720 pigmented area, and (b) a sub-region of the transparent area, depicted in (c). There was  
721 no apparent signal in wing veins but curiously a relatively weak fluorescence intensity  
722 was found in the wing of both anterior (a) and medial (b) regions from 575 to 735 nm.  
723 Scale bar: 100  $\mu$ m.

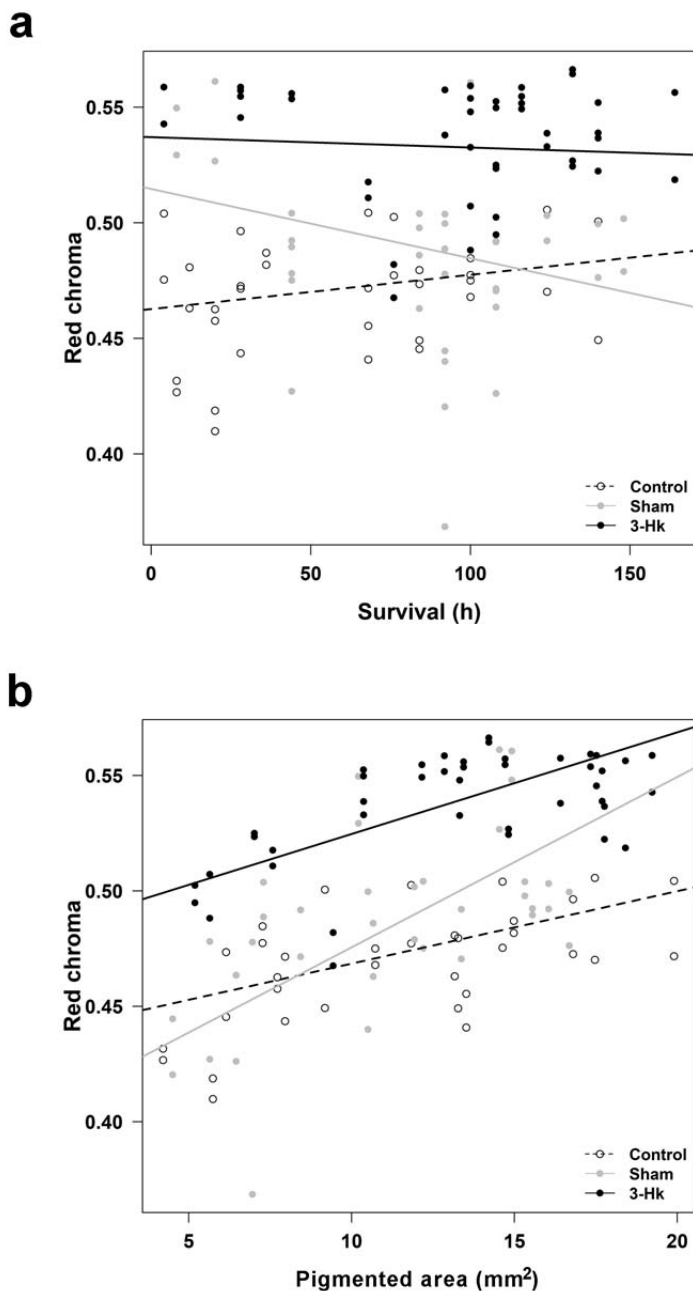

724

725 **Figure S2** (a) Relationship between survival time and red chroma in each experimental  
726 treatment. While in males treated with 3-Hk(continuous black line) red chroma was not  
727 affected by survival time, control males (black dotted line) showed a positive  
728 relationship. In sham males (gray line), chroma was also affected by survival but in a  
729 negative direction. (b) Red chroma was also affected by RWS area. All treatments  
730 showed a positive relationship, but with different slopes.  
731

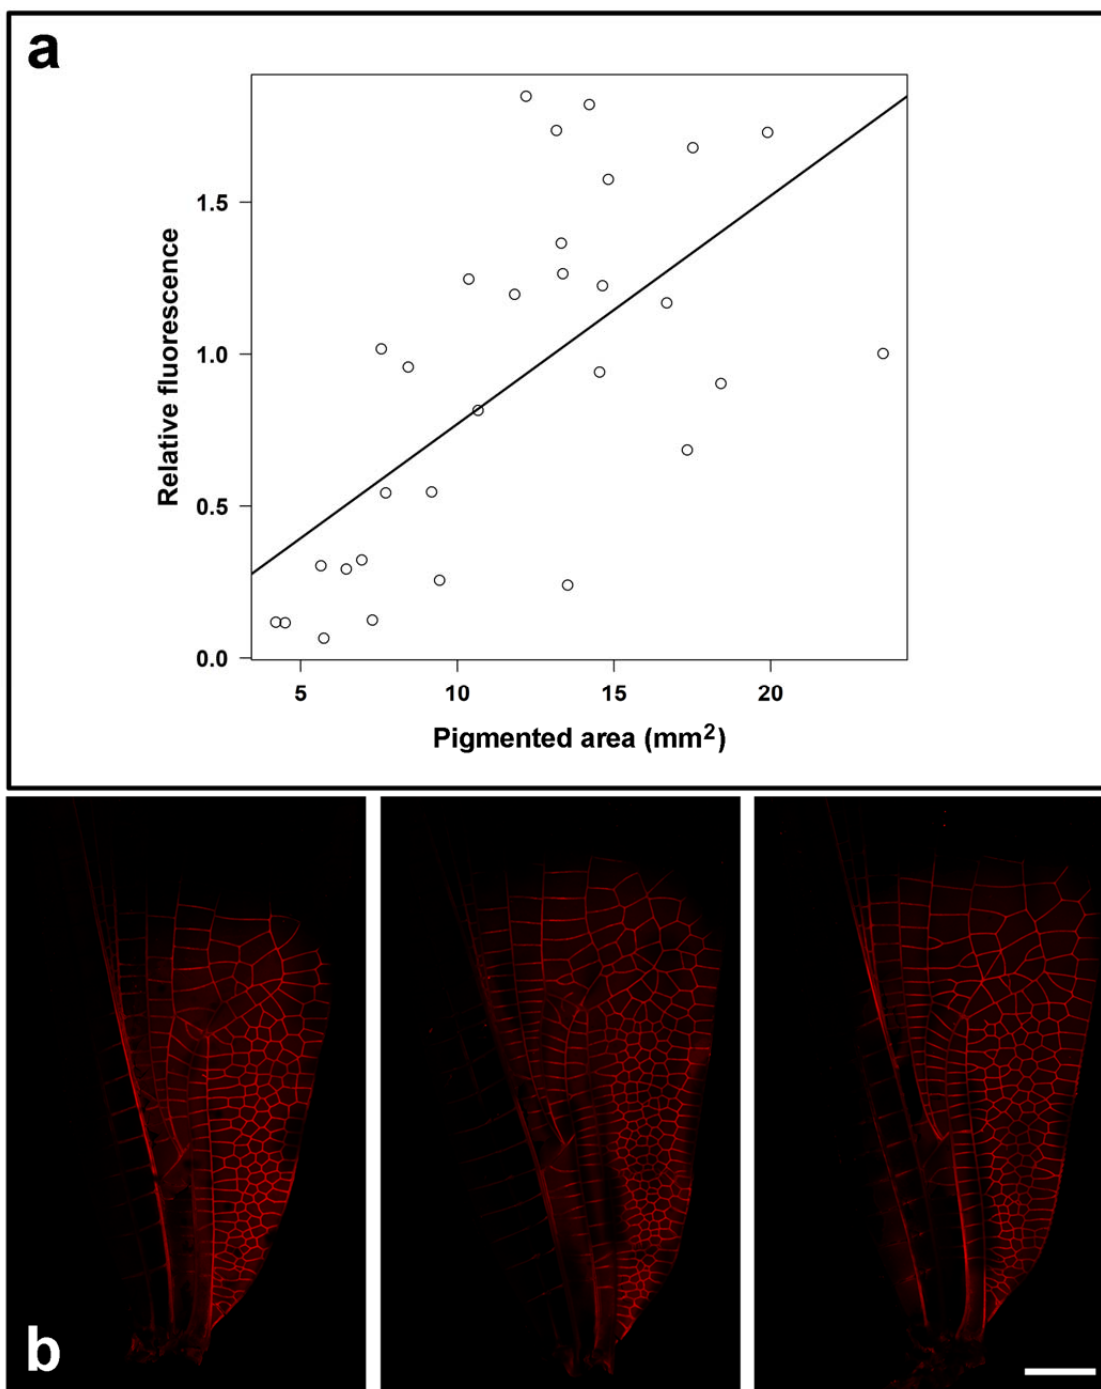

732  
733  
734  
735  
736  
737

**Figure S3** (a) Fluorescence XYZ $\lambda$  scans (425-735 nm) of *H. americana* wings excited at 561 nm of control, sham and 3-Hk males. Although 3-Hk males showed higher fluorescence values, the only significant predictor for this colour property was RWS area, which had a positive relationship in all treatments (b).

738  
739

740

741 **Supplementary tables**

742

743

744 **TABLE S1.** Linear mixed effect model to explain variation in wing red chroma in

745 *Hetaerina americana* males manipulated with 3-Hk, sham or control treatments.

746 Significant predictors are shown in bold. L. Ratio=Likelihood ratio. NS=Not selected in

747 the best supported model.

748

| <b>Effect on red chroma</b> | L. Ratio | P-value          |
|-----------------------------|----------|------------------|
| Treatment                   | 69.07    | <b>&lt;0.001</b> |
| Survival time               | 8.97     | <b>0.030</b>     |
| Wing length                 | 9.99     | <b>0.019</b>     |
| Pigmented area              | 43.42    | <b>&lt;0.001</b> |
| Treatment X Survival        | 8.29     | <b>0.016</b>     |
| Treatment X Wing length     | NS       | NS               |
| Treatment X Pigmented area  | 8.43     | <b>0.014</b>     |

749



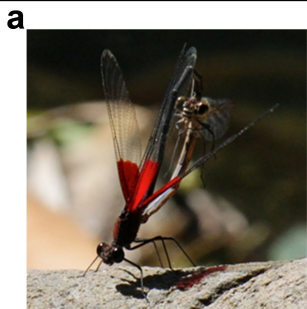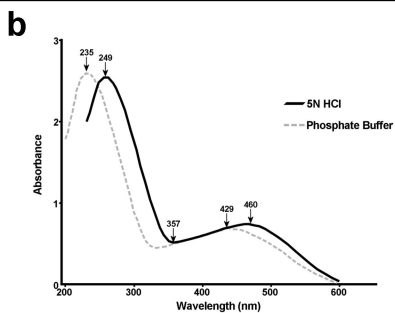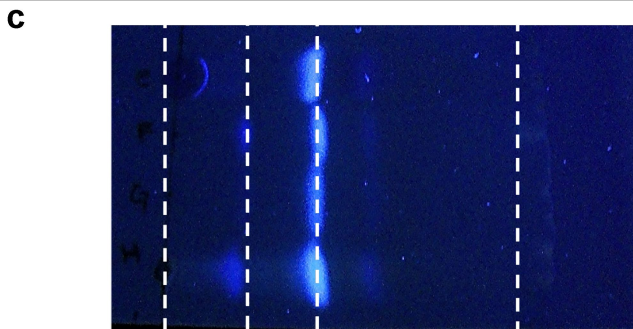

| Migration (cm) | Retention factor | Pigment              |
|----------------|------------------|----------------------|
| 2.3±0.2        | 1 0.15±0.02      | Dihydro-Xanthommatin |
| 5.5±0.1        | 2 0.36±0.01      | Xanthommatin         |
| 15.0±0.2       |                  | Phenol:Water         |

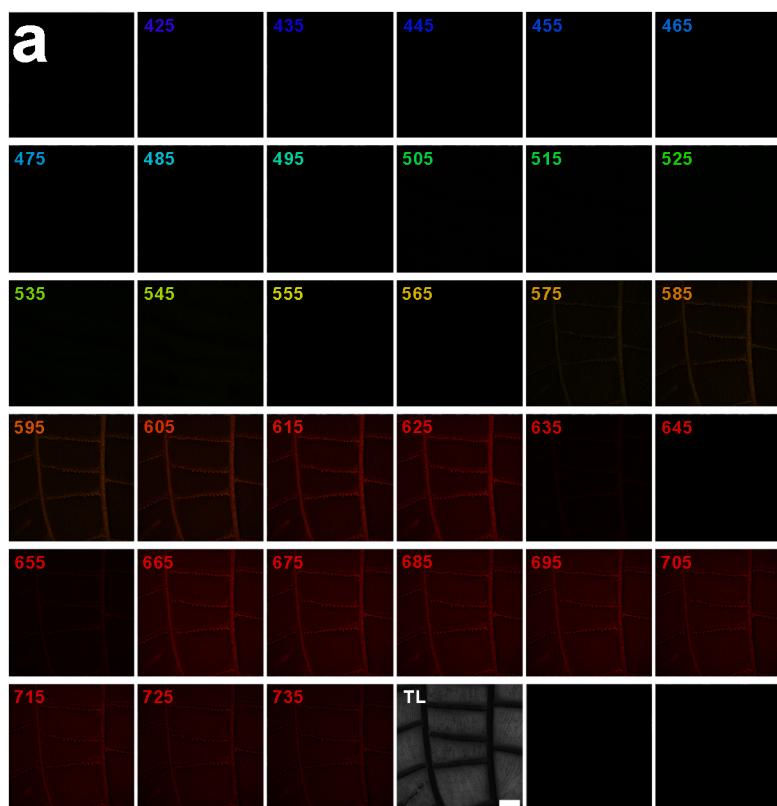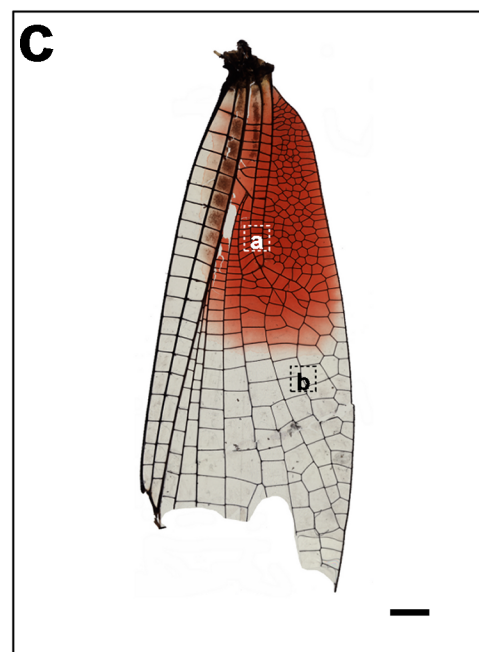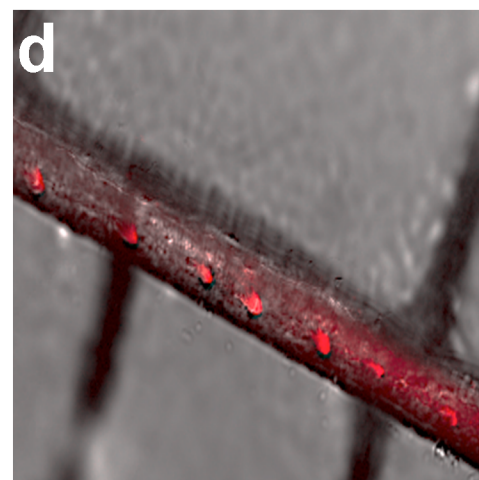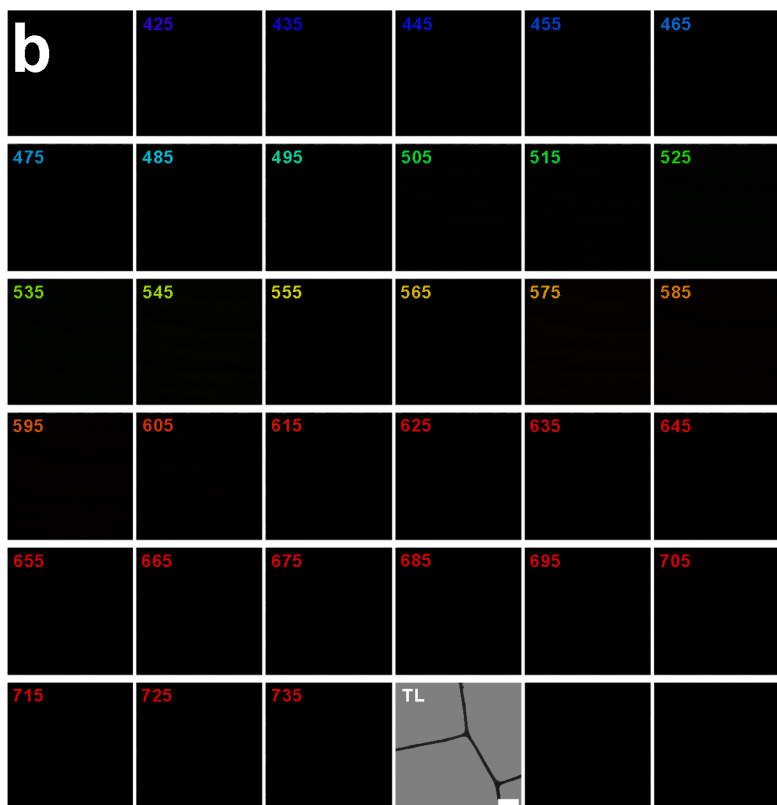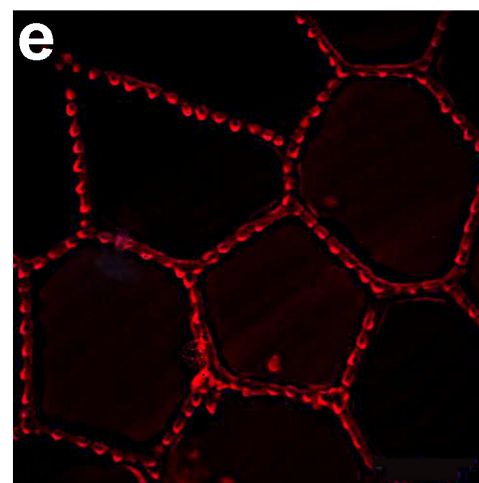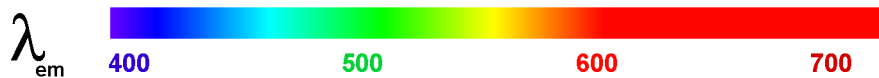

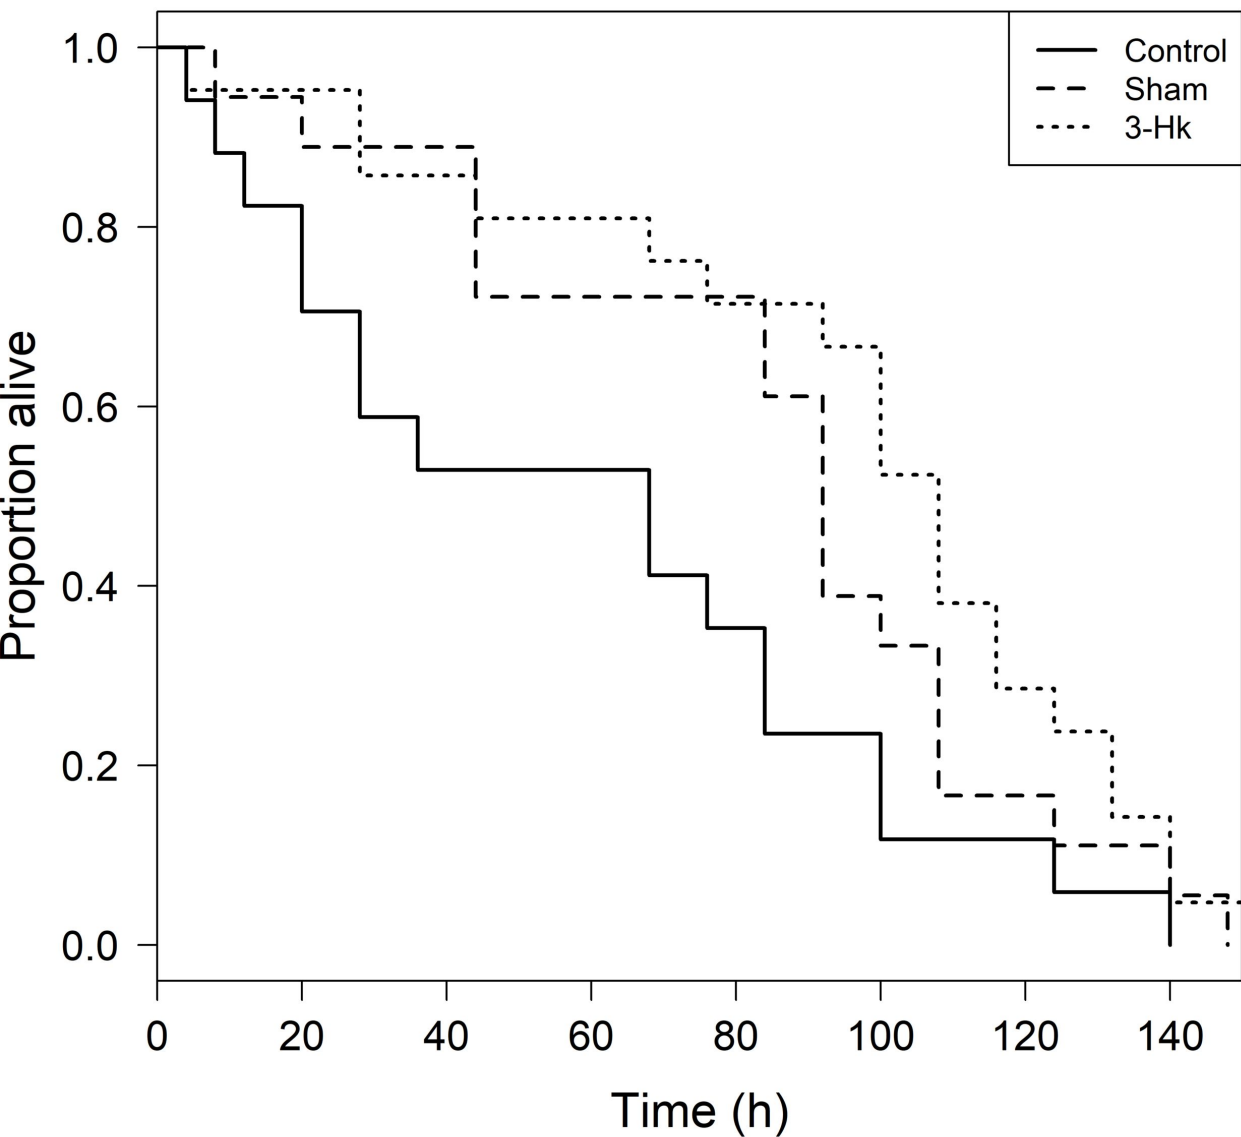

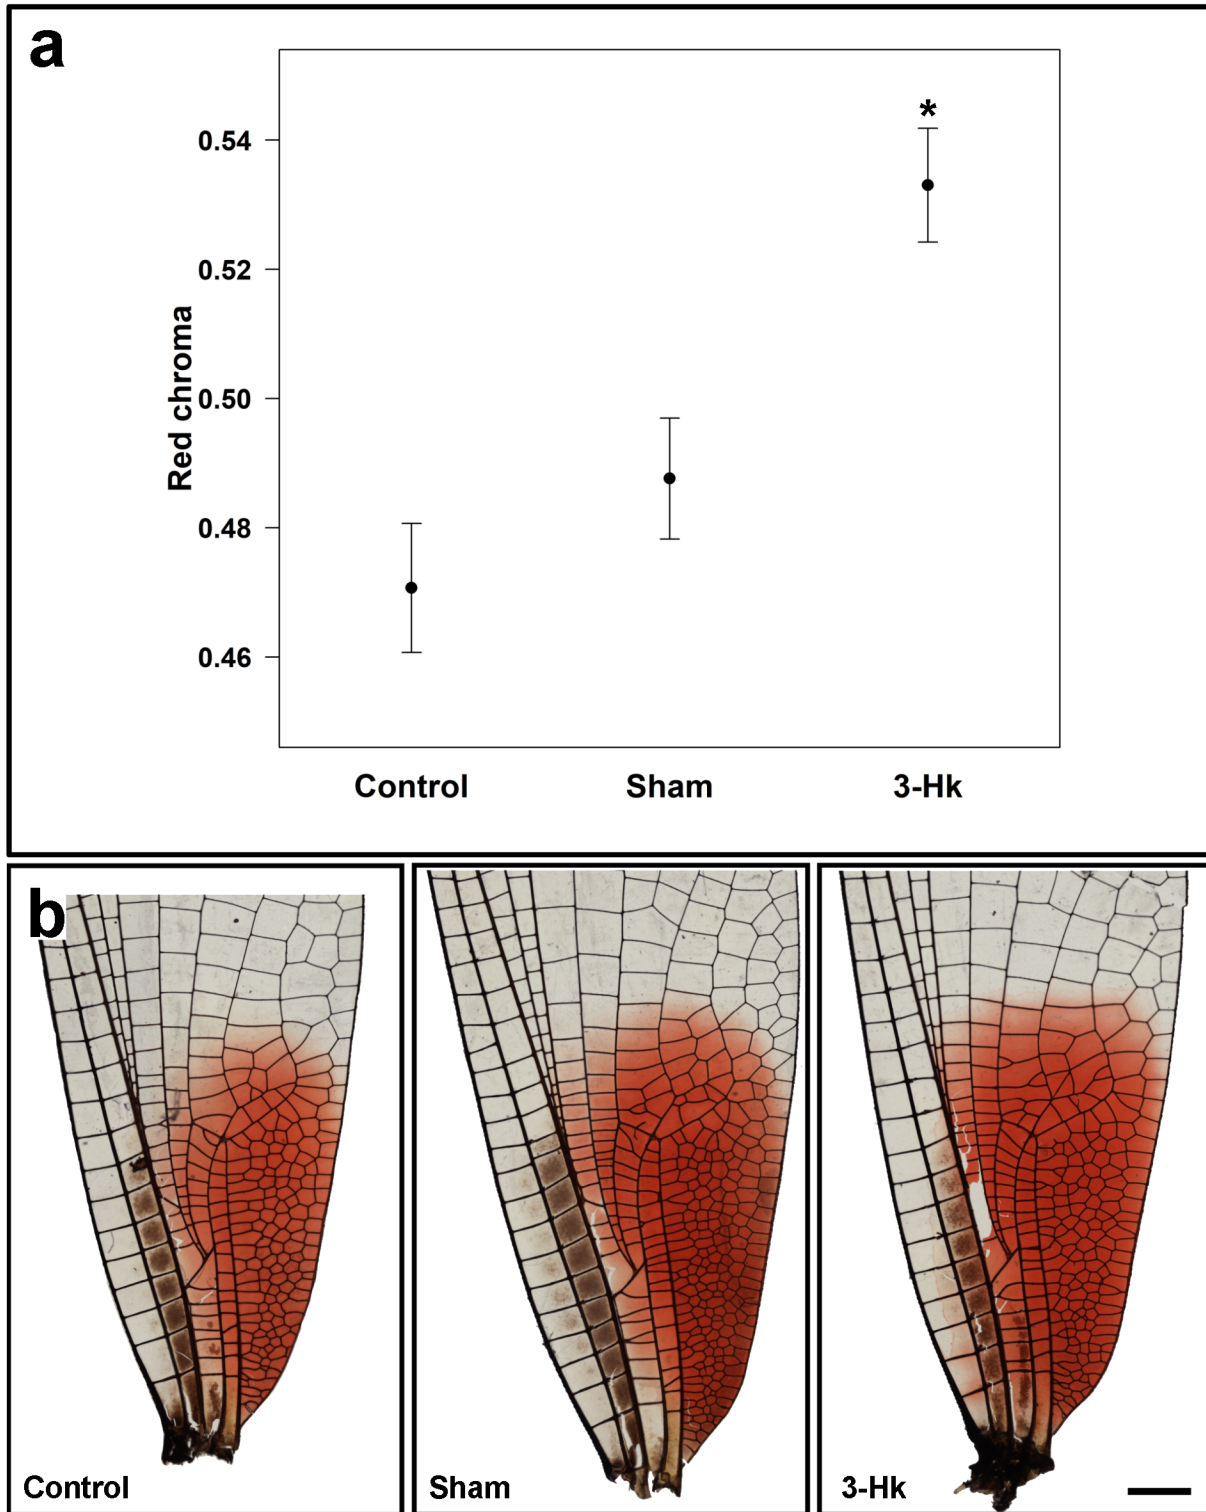

Source: https://www.biorxiv.org/content/10.1101/2020.05.09.086280v1.full.pdf
